# Supplementary material
Source: publisher figshare collection journal article supplement (https://karger.figshare.com/ndownloader/files/24493274)
Supplement: Supplementary file 1 [file 24493274]

**Figure Legends**

Supplementary Fig. 1. Patients recruitment flow chart. Abbreviations: MsPGN, mesangioproliferative glomerulonephritis; SLE, systemic lupus erythematosus; HBV, hepatitis B virus; HSCT, hematopoietic stem cell transplantation; MPGN, membranoproliferative glomerulonephritis.
